# Supplementary material for: An air-liquid interphase approach for modeling the early embryo-maternal contact zone
Source: PubMed Central journal article supplement (PMC5299422; doi:10.1038/srep42298), 2017-02-09
Supplement: srep42298-s1.pdf [file srep42298-s1.pdf]

## Supplementary Information

### **An air-liquid interphase approach for modeling the early embryo-maternal contact zone**

Chen S<sup>1</sup>, Palma-Vera SE<sup>1,2</sup>, Langhammer M<sup>1</sup>, Galuska SP<sup>1</sup>, Braun BC<sup>3</sup>, Krause E<sup>4</sup>, Lucas-Hahn A<sup>5</sup>  
and Schoen J<sup>1\*</sup>

\*Corresponding author (schoen.jennifer@fhn-dummerstorf.de)

### **Supplementary legends:**

Suppl. Table 1: Most abundant proteins in murine, porcine and bovine oviductal fluid surrogates.

Suppl. Table 2: Peptides identified in murine, porcine and bovine oviductal fluid surrogates.

Suppl. Video 1: Developing porcine embryo on ALI-POEC.
